# Supplementary material for: Stanniocalcin-1 Reduces Tumor Size in Human Hepatocellular Carcinoma
Source: PubMed Central journal article supplement (PMC4607425; doi:10.1371/journal.pone.0139977), 2015-10-15
Supplement: pone.0139977.s001.pdf [file pone.0139977.s001.pdf]

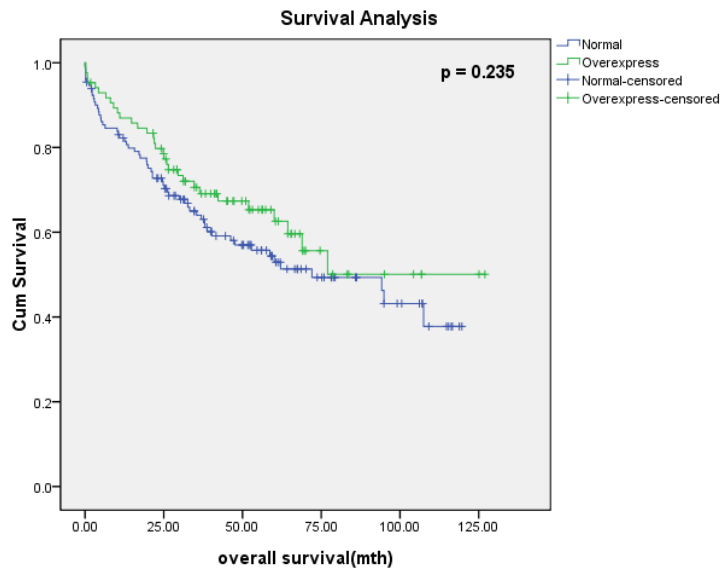

**S1 Figure. Overall survival curves according to the STC1 gene expression levels.** Overall survival curve for high (*green*) and normal/low (*blue*) expression of STC1 in HCC patients (n=216) by Kaplan-Meier analysis. The cohort with STC1-High was not correlated with prolong survival in HCC.
