# Supplementary material for: Stanniocalcin-1 Reduces Tumor Size in Human Hepatocellular Carcinoma
Source: PubMed Central journal article supplement (PMC4607425; doi:10.1371/journal.pone.0139977), 2015-10-15
Supplement: pone.0139977.s004.pdf [file pone.0139977.s004.pdf]

|                  |           | Tumor size (cm) |      |              |
|------------------|-----------|-----------------|------|--------------|
|                  | Frequency | mean            | SD   | p -value     |
| IL6-Normal       | 199       | 7.29            | 4.24 | 0.528        |
| IL6-High         | 17        | 6.77            | 3.11 |              |
| IL8-Normal       | 185       | 7.34            | 4.18 | 0.391        |
| IL8-High         | 31        | 6.67            | 4.03 |              |
| STC1-Normal      | 131       | 7.841           | 4.32 | <b>0.008</b> |
| STC1-High        | 85        | 6.359           | 3.75 |              |
| STC1/IL6 -Normal | 207       | 7.313           | 4.21 | 0.245        |
| STC1/IL6 -High   | 9         | 5.667           | 2.11 |              |
| STC1/IL8 -Normal | 202       | 7.4             | 4.2  | <b>0.025</b> |
| STC1/IL8 -High   | 14        | 5.1             | 3.2  |              |

\* Incomplete patient information

**S1 Table. Clinicopathological data on tumor size among HCC samples with different expression levels of STC1, IL6 and IL8.  $p < 0.05$  was considered as significant.**
